# Supplementary material for: Präklinisches Loading bei Patienten mit akutem Thoraxschmerz und akutem Koronarsyndrom – PRELOAD-Umfrage
Source: Springer Nature journal article supplement (doi:10.1007/s00063-023-01087-8), 2023-11-30
Supplement: MOESM1 [file 26473514]

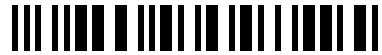

# Teil A:

**A1. Wie alt sind Sie (in Jahren)?**

**A2. Wie ist Ihr Geschlecht?**

Weiblich

Männlich

Divers

  
  

**A3. Wie viele Jahre sind Sie bereits als Notärztin/Notarzt tätig (ganze Jahre)?**

*Im Fall von anteiligen Jahren: runden Sie bitte auf ab 6 Monaten pro angefangenes Jahr, runden Sie bitte ab bis zu 6 Monaten pro angefangenes Jahr.*

**A4. Wie viele Stunden pro Monat arbeiten Sie durchschnittlich als Notärztin/Notarzt?**

< 24 Stunden

24-72 Stunden

72-120 Stunden

> 120 Stunden

  
  
  

**A5. Ihr überwiegendes Einsatzgebiet umfasst welche Stadt- und Bevölkerungsstruktur?**

Ländliche Region und Kleinstadt (<20.000 Einwohner)

Mittelstadt (20.000 bis <100.000 Einwohner)

Großstadt (ab 100.000 Einwohner)

Metropole (ab 1.000.000 Einwohner)

  
  
  

**A6. In welchem Fachgebiet führen Sie die Facharztbezeichnung bzw. in welchem Fachgebiet erfolgt aktuell ihre Facharztweiterbildung?**

Innere Medizin und Kardiologie

Innere Medizin ohne Kardiologie

Chirurgie

Anästhesie

Andere Fachrichtung

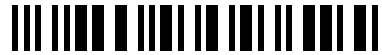

**A7. FALLBEISPIEL 1**

**Präklinische Anamnese:**

**61 jähriger männlicher Patient mit akutem Thoraxschmerz seit 2 Stunden, retrosternale Lokalisation mit Ausstrahlung in den linken Arm; keine Dauermedikation.**

**Präklinische Befunde:**

**Herzfrequenz: 60/min, Blutdruck 100/60mmHg, Atemfrequenz 21/min, SpO2: 92% unter Raumluft; ST-Streckenhebungen in den EKG-Ableitungen II, III, aVF und V6; reziproke ST-Senkungen in I, aVL und V1-3.**

**Arbeitsdiagnose:**

**STEMI der Hinterwand. Sie fahren das nächstgelegene Herzkatheterlabor mit 24h/7Tage Interventionsbereitschaft an, die Fahrtzeit beträgt 10-15 Minuten.**

***Wie gehen Sie in diesem Fall präklinisch mit „Loading“ (Plättchenhemmung, Antikoagulation) um?***

- Sie applizieren einzig ASS i.v. (Standarddosis)
- Sie applizieren einzig unfraktioniertes Heparin i.v. (Standarddosis)
- Sie applizieren ASS i.v. und unfraktioniertes Heparin i.v. (jeweils Standarddosis)
- Sie geben präklinisch keine Plättchenhemmung und kein Antikoagulation.

|  |
|--|
|  |
|  |
|  |
|  |

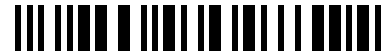

**A8. FALLBEISPIEL 2**

**Präklinische Anamnese:**

**52 jähriger männlicher Patient mit akutem Thoraxschmerz seit 4 Stunden; retrosternale Lokalisation, brennender Charakter und mit Ausstrahlung in den linken Arm, keine Dauermedikation.**

**Präklinische Befunde:**

**Herzfrequenz: 60/min, Blutdruck 140/80mmHg, Atemfrequenz 18/min, SpO2: 95% unter Raumluft; keine Erregungsleitungsstörungen, kein Schenkelblock, keine ST-Streckenveränderungen.**

**Arbeitsdiagnose:**

**Anginöser Thoraxschmerz, mögliches akutes Koronarsyndrom (NSTEMI, instabile Angina pectoris). Sie fahren die nächstgelegene Brustschmerzambulanz (Chest Pain Unit) an, die Fahrtzeit beträgt 10-15 Minuten.**

***Wie gehen Sie in diesem Fall präklinisch mit „Loading“ (Plättchenhemmung, Antikoagulation) um?***

Sie applizieren einzig ASS i.v. (Standarddosis)

Sie applizieren einzig unfraktioniertes Heparin i.v. (Standarddosis)

Sie applizieren ASS i.v. und unfraktioniertes Heparin i.v. (jeweils Standarddosis)

Sie geben präklinisch keine Plättchenhemmung und kein Antikoagulan.

|  |
|--|
|  |
|  |
|  |
|  |

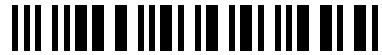

**A9. FALLBEISPIEL 3**

**Präklinische Anamnese:**

**61 jähriger männlicher Patient mit akutem Thoraxschmerz seit 2 Stunden, retrosternale Lokalisation mit Ausstrahlung in den linken Arm; paroxysmales Vorhofflimmern in der Anamnese, Dauermedikation: Rivaroxaban 20mg/Tag, Antihypertensivum, orales Antidiabetikum.**

**Präklinische Befunde:**

**Herzfrequenz: 60/min, Blutdruck 100/60mmHg, Atemfrequenz 21/min, SpO2: 92% unter Raumluft; ST-Streckenhebungen in den EKG Ableitungen V1-4; reziproke ST-Senkungen in in den EKG Ableitungen II, III, aVF.**

**Arbeitsdiagnose:**

**STEMI der Vorderwand. Sie fahren das nächstgelegene Herzkatheterlabor mit 24h/7Tage Interventionsbereitschaft an, die Fahrtzeit beträgt 10-15 Minuten.**

***Wie gehen Sie in diesem Fall präklinisch mit „Loading“ (Plättchenhemmung, Antikoagulation) um?***

- Sie applizieren einzig ASS i.v. (Standarddosis)
- Sie applizieren einzig unfraktioniertes Heparin i.v. (Standarddosis)
- Sie applizieren ASS i.v. und unfraktioniertes Heparin i.v. (jeweils Standarddosis)
- Sie geben präklinisch keine Plättchenhemmung und kein Antikoagulan.

|                          |
|--------------------------|
| <input type="checkbox"/> |
| <input type="checkbox"/> |
| <input type="checkbox"/> |
| <input type="checkbox"/> |

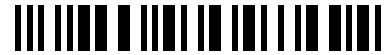

**A10. FALLBEISPIEL 4**

**Präklinische Anamnese:**

**52 jähriger männlicher Patient mit akutem Thoraxschmerz seit 4 Stunden; retrosternale Lokalisation, brennender Charakter und mit Ausstrahlung in den linken Arm; paroxysmales Vorhofflimmern in der Anamnese, Dauermedikation: Marcumar (Phenprocoumon) gesteuert nach INR-Wert (INR vom Vortag 2,5), Antihypertensivum, orales Antidiabetikum.**

**Präklinische Befunde:**

**Herzfrequenz: 60/min, Blutdruck 140/80mmHg, Atemfrequenz 18/min, SpO2: 95% unter Raumluft; keine Erregungsleitungsstörungen, kein Schenkelblock, keine ST-Streckenveränderungen**

**Arbeitsdiagnose:**

**Anginöser Thoraxschmerz, mögliches akutes Koronarsyndrom (NSTEMI, instabile Angina pectoris). Sie fahren die nächstgelegene Brustschmerzambulanz (Chest Pain Unit) an, die Fahrtzeit beträgt 10-15 Minuten.**

***Wie gehen Sie in diesem Fall präklinisch mit „Loading“ (Plättchenhemmung, Antikoagulation) um?***

- Sie applizieren einzig ASS i.v. (Standarddosis)
- Sie applizieren einzig unfraktioniertes Heparin i.v. (Standarddosis)
- Sie applizieren ASS i.v. und unfraktioniertes Heparin i.v. (jeweils Standarddosis)
- Sie geben präklinisch keine Plättchenhemmung und kein Antikoagulanz.

|                          |
|--------------------------|
| <input type="checkbox"/> |
| <input type="checkbox"/> |
| <input type="checkbox"/> |
| <input type="checkbox"/> |

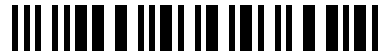

**A11. FALLBEISPIEL 5**

**Präklinische Anamnese:**

**61 jähriger männlicher Patient mit akutem Thoraxschmerz seit 2 Stunden, retrosternale Lokalisation mit Ausstrahlung in den linken Arm; paroxysmales Vorhofflimmern in der Anamnese, Dauermedikation: Marcumar (Phenprocoumon) gesteuert nach INR-Wert (INR vom Vortag 2,5), Antihypertensivum, orales Antidiabetikum**

**Präklinische Befunde:**

**Herzfrequenz: 60/min, Blutdruck 100/60mmHg, Atemfrequenz 21/min, SpO2: 92% unter Raumluft; ST-Streckenhebungen in den EKG Ableitungen V1-4; reziproke ST-Senkungen in in den EKG Ableitungen II, III, aVF.**

**Arbeitsdiagnose:**

**STEMI der Vorderwand. Sie fahren das nächstgelegene Herzkatheterlabor mit 24h/7Tage Interventionsbereitschaft an, die Fahrtzeit beträgt 10-15 Minuten.**

**Wie gehen Sie in diesem Fall präklinisch mit „Loading“ (Plättchenhemmung, Antikoagulation) um?**

- Sie applizieren einzig ASS i.v. (Standarddosis)
- Sie applizieren einzig unfraktioniertes Heparin i.v. (Standarddosis)
- Sie applizieren ASS i.v. und unfraktioniertes Heparin i.v. (jeweils Standarddosis)
- Sie geben präklinisch keine Plättchenhemmung und kein Antikoagulanz.

|  |
|--|
|  |
|  |
|  |
|  |

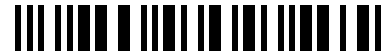

**A12. FALLBEISPIEL 6**

**Präklinische Anamnese:**

**52 jähriger männlicher Patient mit akutem Thoraxschmerz seit 4 Stunden; retrosternale Lokalisation, brennender Charakter und mit Ausstrahlung in den linken Arm; paroxysmales Vorhofflimmern in der Anamnese, Dauermedikation: Rivaroxaban 20mg/Tag, Antihypertensivum, orales Antidiabetikum**

**Präklinische Befunde:**

**Herzfrequenz: 60/min, Blutdruck 140/80mmHg, Atemfrequenz 18/min, SpO2: 95% unter Raumluft; keine Erregungsleitungsstörungen, kein Schenkelblock, keine ST-Streckenveränderungen**

**Arbeitsdiagnose:**

**Anginöser Thoraxschmerz, mögliches akutes Koronarsyndrom (NSTEMI, instabile Angina pectoris). Sie fahren die nächstgelegene Brustschmerzambulanz (Chest Pain Unit) an, die Fahrtzeit beträgt 10-15 Minuten.**

***Wie gehen Sie in diesem Fall präklinisch mit „Loading“ (Plättchenhemmung, Antikoagulation) um?***

Sie applizieren einzig ASS i.v. (Standarddosis)

Sie applizieren einzig unfraktioniertes Heparin i.v. (Standarddosis)

Sie applizieren ASS i.v. und unfraktioniertes Heparin i.v. (jeweils Standarddosis)

Sie verzichten auf ein Loading. Sie geben präklinisch keine Plättchenhemmung und kein Antikoagulan.

|  |
|--|
|  |
|  |
|  |
|  |

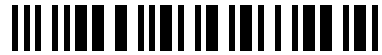

**A13. FALLBEISPIEL 7**

**Präklinische Anamnese:**

**55 jähriger männlicher Patient mit beobachtetem Herzkreislaufstillstand, prompte Laienreanimation (Low-flow Zeit: 8 Minuten), unbekannte medizinische Vorgeschichte**

**Präklinische Befunde:**

**initialer Rhythmus Kammerflimmern, Rückkehr des Spontankreislaufs nach 2. Schockabgabe. Hämodynamisch stabiler Patient ohne Herzrhythmusstörungen und ohne Katecholaminbedarf. EKG unter Spontankreislauf ohne ST-Streckenveränderungen, kein Schenkelblock, ohne Erregungsleitungsstörungen**

**Arbeitsdiagnose:**

**Extraklinisches Reanimationsereignis mit einsetzendem Spontankreislauf und ohne ST-Streckenhebungen im 12-Kanal-EKG. Sie fahren das nächstgelegene Cardiac Arrest Center an, die Fahrtzeit beträgt 10-15 Minuten.**

***Wie gehen Sie in diesem Fall präklinisch mit „Loading“ (Plättchenhemmung, Antikoagulation) um?***

Sie applizieren einzig ASS i.v. (Standarddosis)

Sie applizieren einzig unfraktioniertes Heparin i.v. (Standarddosis)

Sie applizieren ASS i.v. und unfraktioniertes Heparin i.v. (jeweils Standarddosis)

Sie verzichten auf ein Loading. Sie geben präklinisch keine Plättchenhemmung und kein Antikoagulanz.

|  |
|--|
|  |
|  |
|  |
|  |



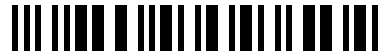

**A14. FALLBEISPIEL 8**

**Präklinische Anamnese:**

**55 jähriger männlicher Patient mit beobachtetem Herzkreislaufstillstand, prompte Laienreanimation (Low-flow Zeit: 8 Minuten), unbekannte medizinische Vorgeschichte. Vor dem Kollaps habe der Patient gemäß den umstehenden Personen über drückenden retrosternalen Brustschmerz geklagt.**

**Präklinische Befunde:**

**initialer Rhythmus Kammerflimmern, Rückkehr des Spontankreislaufs nach 2. Schockabgabe. Hämodynamisch stabiler Patient ohne Herzrhythmusstörungen und ohne Katecholaminbedarf. EKG unter Spontankreislauf ohne ST-Streckenveränderungen, kein Schenkelblock, ohne Erregungsleitungsstörungen**

**Arbeitsdiagnose:**

**Extraklinisches Reanimationsereignis mit einsetzendem Spontankreislauf und ohne ST-Streckenhebungen im 12-Kanal-EKG. Sie fahren das nächstgelegene Cardiac Arrest Center an, die Fahrtzeit beträgt 10-15 Minuten.**

***Wie gehen Sie in diesem Fall präklinisch mit „Loading“ (Plättchenhemmung, Antikoagulation) um?***

Sie applizieren einzig ASS i.v. (Standarddosis)

Sie applizieren einzig unfraktioniertes Heparin i.v. (Standarddosis)

Sie applizieren ASS i.v. und unfraktioniertes Heparin i.v. (jeweils Standarddosis)

Sie verzichten auf ein Loading. Sie geben präklinisch keine Plättchenhemmung und kein Antikoagulanz.

|  |
|--|
|  |
|  |
|  |
|  |

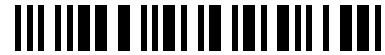

**A15. FALLBEISPIEL 9**

**Präklinische Anamnese:**

**52 jähriger männlicher Patient mit akutem, anhaltenden, drückenden Thoraxschmerz seit 4 Stunden; retrosternale Lokalisation, brennender Charakter und mit Ausstrahlung in den linken Arm; Dauermedikation: Antihypertensivum, orales Antidiabetikum**

**Präklinische Befunde:**

**Herzfrequenz: 92/min, Blutdruck 80/40mmHg, Atemfrequenz 25/min, SpO2: 90% unter Raumluft; nicht-anhaltende, selbstlimitierende ventrikuläre Tachykardie über eine Monitorlänge, ST-Streckenensenkungen über der Vorderwand, keine ST-Streckenhebungen, kein Schenkelblock.**

**Arbeitsdiagnose:**

**Anginöser Thoraxschmerz, mögliches akutes Koronarsyndrom (NSTEMI, instabile Angina pectoris) mit kardiogenem Schock. Sie fahren die nächstgelegene Brustschmerzambulanz (Chest Pain Unit) an, die Fahrtzeit beträgt 10-15 Minuten.**

*Wie gehen Sie in diesem Fall präklinisch mit „Loading“ (Plättchenhemmung, Antikoagulation) um?*

- Sie applizieren einzig ASS i.v. (Standarddosis)
- Sie applizieren einzig unfraktioniertes Heparin i.v. (Standarddosis)
- Sie applizieren ASS i.v. und unfraktioniertes Heparin i.v. (jeweils Standarddosis)
- Sie verzichten auf ein Loading. Sie geben präklinisch keine Plättchenhemmung und kein Antikoagulan.

|                          |
|--------------------------|
| <input type="checkbox"/> |
| <input type="checkbox"/> |
| <input type="checkbox"/> |
| <input type="checkbox"/> |

**A16. Bestehen nach Ihrer Einschätzung explizite Leitlinienempfehlungen (nationale und europäische Ebene) zum Einsatz des präklinischen Loadings bei ST-Streckenhebungsinfarkt (STEMI)?**

- Ja
- Nein
- Ich kenne die aktuellen Leitlinienempfehlungen nicht ausreichend zu Beurteilung der Frage.

|                          |
|--------------------------|
| <input type="checkbox"/> |
| <input type="checkbox"/> |
| <input type="checkbox"/> |

**A17. Bestehen nach Ihrer Einschätzung explizite Leitlinienempfehlungen (nationale und europäische Ebene) zum Einsatz des präklinischen Loadings bei nicht-ST-Streckenhebungsinfarkt (NSTEMI)?**

- Ja
- Nein
- Ich kenne die aktuellen Leitlinienempfehlungen nicht ausreichend zu Beurteilung der Frage.

|                          |
|--------------------------|
| <input type="checkbox"/> |
| <input type="checkbox"/> |
| <input type="checkbox"/> |

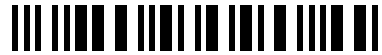

**A18. Bestehen nach Ihrer Einschätzung explizite Leitlinienempfehlungen (nationale und europäische Ebene) zum Einsatz des präklinischen Loadings bei Patienten mit extraklinischer Reanimation ohne ST-Streckenhebungen nach Rückkehr des Spontankreislaufs?**

Ja

Nein

|                          |
|--------------------------|
| <input type="checkbox"/> |
| <input type="checkbox"/> |
| <input type="checkbox"/> |

Ich kenne die aktuellen Leitlinienempfehlungen nicht ausreichend zu Beurteilung der Frage.
